# Supplementary material for: Controllable wetting state high adhesion hydrophobic surface
Source: Royal Society of Chemistry journal article supplement (doi:10.1039/c6ra14756a), 2016-01-01
Supplement: c6ra14756a1.pdf [file c6ra14756a1.pdf]

**Controllable Wetting State High Adhesion Hydrophobic Surface**  
**Supporting Information**

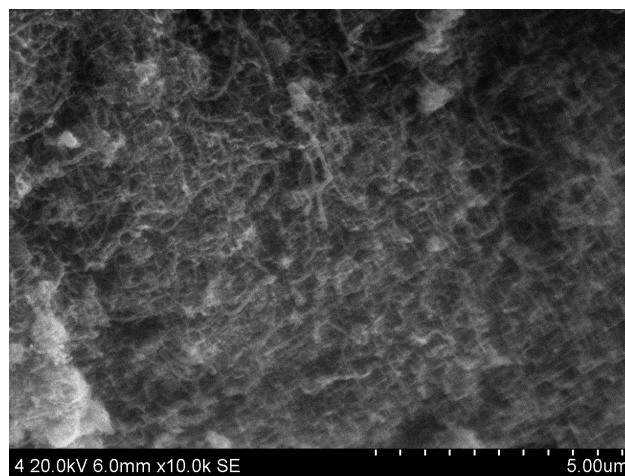

Figure S1 the magnified SEM images of untreated MWCNT-COOH

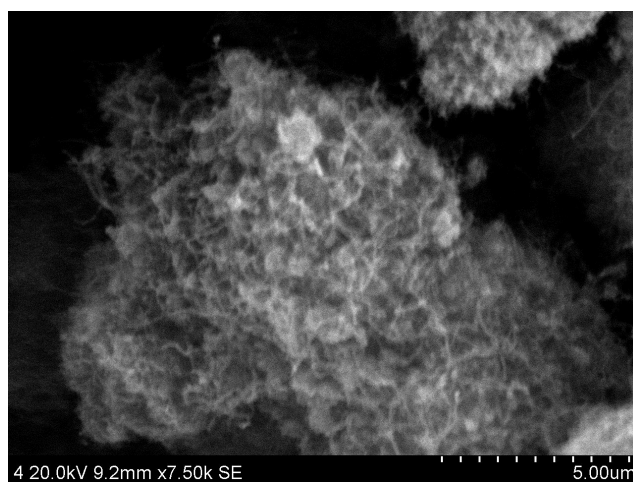

Figure S2 the magnified SEM images of untreated MWCNT-COOH

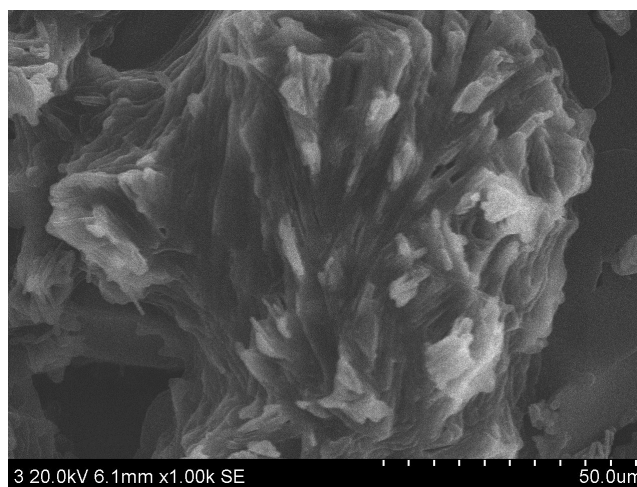

Figure S3 magnified SEM image of S3 surface

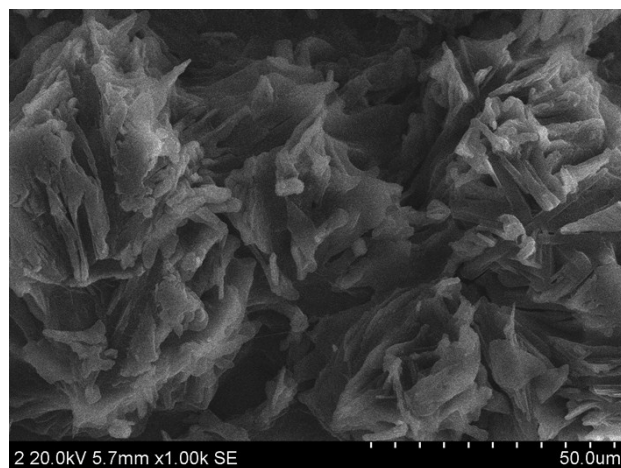

Figure S4 magnified SEM image of S4 surface
